# Supplementary material for: Plant Growth Absorption Spectrum Mimicking Light Sources
Source: MDPI journal article supplement (doi:10.3390/ma8085240), 2015-08-13
Supplement: s1 [file s1]

# Supplementary Materials

**Table S1.** Summary of the spectrum resemblance with respect to the photosynthetic action spectrum (PAS),  $SR_{PAS}$ , for a high pressure sodium (HPS) lamp, an incandescent bulb, a fluorescent lamp, and a plant factory light emitting diode (PF-LED).

| Light Sources                               | $SR_{PAS}$ (%) |
|---------------------------------------------|----------------|
| High pressure sodium lamps (HPS)            | 38             |
| Incandescent bulb                           | 50             |
| Fluorescent tube                            | 60             |
| Plant factory light emitting diode (PF-LED) | 58             |

**Table S2.** Summary of model number, CCT, and CRI for a high pressure sodium (HPS) lamp, an incandescent bulb, a fluorescent lamp, a plant factory light emitting diode (PF-LED), and a typical LED.

| Light Sources     | Model No.                                                                          | CCT    | CRI |
|-------------------|------------------------------------------------------------------------------------|--------|-----|
| HPS               | Street lamp                                                                        | 1760 K | 16  |
| Incandescent bulb | (TOA)E27/40W                                                                       | 2300 K | 99  |
| CFL               | TL5HE35W                                                                           | 5500 K | 85  |
| PF-LED            | adopted from LumiGrow ES330 LED Grow Light Spectrum<br>(LumiGrow, Novato, CA, USA) |        |     |
| Typical LED       | PH520102                                                                           | 6200 K | 77  |
